# Supplementary material for: Wind and Phytoplankton Dynamics Drive Seasonal and Short-Term Variability of Suspended Matter in a Tidal Basin
Source: Copernicus journal article supplement (doi:10.5194/egusphere-2025-2135), 2025-06-18
Supplement: Supplementary file [file egusphere-2025-2135-AC3-supplement.pdf]

## Response to Reviewer #1

**Manuscript title:** *“Wind and Phytoplankton Dynamics Drive Seasonal and Short-Term Variability of Suspended Matter in a Tidal Basin”*

We would like to sincerely thank Reviewer #1 for their detailed and constructive feedback. We greatly appreciate the time and effort invested in reviewing our manuscript. Below, we provide a point-by-point response to each of the comments and describe the corresponding revisions made to the manuscript.

Reviewer comments are shown in **bold**, and our responses are given in regular font below each comment.

.....

**The authors introduced an interesting approach to investigate the effect of wind and phytoplankton on the seasonality in SPM concentration. Although the subject is of great interest, the study itself has many flaws and shortcomings. The manuscript is too long, with many repetitions, there is no clear difference between results and discussions. The flaws are**

**1) The SPM concentration time series is patchy and does not catch tidal variability. This may lead to an overestimation of wind effects as tidal variability is not included in the data.**

The SPM concentration time series is patchy due to the nature of field-based sampling. Nevertheless, the dataset includes the exact times of the sampling, which allows us to identify the moment of the tidal phase accurately. We have reconstructed sea surface height (SSH) and tidal phase for all sampling time instants for the considered years (2000-2019) using harmonic analysis of model output with a resolution of 5 minutes. These reconstructed tidal variables were included as features in the statistical and neural network analyses to help account for tidal influence at the time of each sample. In addition to the tides, the wind conditions were retrieved from the meteorological station based on the List (Sylt/ Germany) for the whole duration of the time-series. We would like to note that the length of the time series spanning over 20 years provides statistically robust coverage across a range of tidal phases and seasonal conditions.

**2) The Lagrangian particle trajectories are not representative for SPM transport. The added value of the model results is limited.**

We agree that Lagrangian tracking cannot replace a sediment module, and we did not claim otherwise. There are several reasons why we chose not to run a full sediment module and instead used Neural Network (NN) and Lagrangian simulations.

First, we lack detailed habitat mapping for the study area, and we do not have reliable suspended particulate matter (SPM) fluxes at the open boundary. Additionally, the specific properties of the particles relevant to this region remain uncertain. The available SPM observational data represent total concentrations, encompassing both organic and inorganic

materials, without distinguishing between different particle types. Given the relatively small spatial scale of the study area, such uncertainties are particularly significant and limit the effectiveness of traditional sediment modeling approaches. Furthermore, our study spans a 20-year period, during which numerous potential forcing scenarios exist. For this reason, we opted to use a Neural Network trained on observational data to predict SPM concentrations and to assess the role of biological activity at two sampling locations. But the NN does not explain why the SPM dynamics differ between the two stations, apart from the evident influence of depth. While we acknowledge that passive tracers do not capture the full complexity of SPM transport (e.g., settling, flocculation, or bed interaction), the purpose of this component was not to simulate sediment dynamics directly. Rather, it aimed to explore hydrodynamic connectivity and dominant transport pathways within the basin. As also positively noted by Reviewer #2, the passive tracer simulations provide an efficient and computationally inexpensive means of identifying likely source regions and transport timescales, without requiring detailed sedimentological input, which is often highly uncertain. The simulations, run over two synodic months, capture statistically robust tidal transport patterns. These results help explain, for example, the delayed wind response observed at the deep station compared to the shallow site, a pattern confirmed across different wind scenarios. We have clarified the scope and limitations of the particle tracking experiment in the revised manuscript, emphasizing that these trajectories are not intended to represent particulate fate but to provide insight into spatial connectivity and transit times under tidal forcing.

**3) As the correlation between wind and SPM concentration is low, the authors still ascribe the higher winter concentrations (when biological effects are small) to claim wind effects. Do you need wind to explain the seasonality? Would biology be not sufficient. What are the arguments to claim that higher SPM concentrations align with winds?**

We acknowledge that the correlation between wind speed and SPM concentration is not particularly strong. However, this is expected given the inherent complexity and non-linearity of coastal dynamics. Nevertheless, wind remains an important factor in explaining the observed seasonal patterns in SPM concentrations.

The Sylt-Rømø Bight is a relatively shallow area, where wind stress and tidal forcing induce velocity shear and generate significant turbulence throughout the water column, including near the bottom. A typical storm event in the North Sea can mix the water column to depths of up to 50 meters within just two days (see the FLEX experiment in Burchard et al., 2002; Notably, the modeling results from that study, which did not include wave breaking, were still able to reproduce this mixing efficiently). This turbulence is a primary driver of sediment resuspension in shallow areas (e.g., Fettweis et al., 2012; Stanev et al., 2009). Exactly for this reason, the Neural Network trained using only abiotic conditions was able to predict winter-season SPM concentrations with high accuracy.

While biological activity does not directly cause resuspension or generate currents, it can influence resuspension processes by modifying the properties of the bed substrate and affecting flocculation dynamics. The key question is to what extent biological activity also contributes to the overall variability of SPM. While biological factors such as flocculation and

sediment stabilization are central to the spring-summer decline in SPM concentrations, they are insufficient to explain the consistently higher concentrations observed during winter months.

**4) The effect of biological processes on SPM dynamics is described indirectly using Chl-a and temperature as a proxy of phytoplankton. This is not convincing as both parameters do not reflect the complicated biological processes.**

We agree that the biological processes influencing SPM dynamics are complex and cannot be fully captured by chlorophyll-a and temperature alone. We are aware that flocculation, grazing, benthic–pelagic coupling, and biofilm formation all depend on species composition, microbial activity, and organic matter characteristics. Such data that could help us separate between grazing, benthopelagic coupling, flocculation, etc., is unfortunately not available. Nevertheless, chlorophyll-a remains a broadly used proxy for phytoplankton biomass and, by extension, biological influence on particle aggregation (e.g., Cloern, 1999).

We have clarified these limitations and now emphasize that our interpretation is exploratory rather than conclusive. The Neural Network results are discussed in the context of these constraints, and we explicitly acknowledge that more targeted biological data (e.g., TEP, EPS, biofilm formation) would be needed to fully resolve biological contributions to SPM dynamics.

**5) Physical and biological induced flocculation is not well described in the manuscript, resulting in statements that are only partially true.**

We appreciate the reviewer's attention to the details of flocculation processes. However, we would like to clarify that this study is not focused on flocculation per se, but rather on the broader set of physical and biological processes influencing SPM concentrations. We acknowledge flocculation as one of the most direct biologically mediated mechanisms contributing to SPM variability, but we do not attempt to resolve it mechanistically. Moreover, our dataset does not allow for the separation of individual biological processes involved, including not only flocculation, but also grazing, benthic–pelagic coupling.

In response to the reviewer's feedback, we have revised the Introduction to more accurately describe flocculation and its biological and physical drivers, while maintaining the overall focus on integrated physical–biological controls of SPM concentrations.

**SPM, SPM level etc. is not a synonymous of SPM concentration: when you mean the latter add (replace by) 'concentration'.**

Revised accordingly.

## **1. Introduction**

**The introduction needs to be rewritten as it is now a string of sentences without a common storyline. It should remind the state of the art background information (many references are from older literature >25yrs, which is ok, but there has been some progress since) and sets out the main research questions and why they are of importance.**

We appreciate the reviewer for the feedback. We agree and have revised the manuscript referring to a more recent literature and tightened up our Introduction.

**L43: What do you mean by 'primary production gradients'**

In the revised manuscript, we clarified that the term refers to spatial variability in primary productivity that is associated with light limitation caused by suspended particulate matter.

**L45-46: I would not introduce here the study site.**

Following the suggestion, we have removed the early introduction of the Sylt-Rømø Bight from this paragraph. However, we retained the broader context of Wadden Sea-specific processes, as they provide important background for the mechanisms discussed in the study.

**L49: Not clear how the import of SPM and OM is reflected by the heterotrophic nature of the Wadden Sea. Import means from the North Sea?**

We appreciate this comment and agree that the sentence lacked clarity. We have therefore removed the sentence from the revised manuscript.

**L51: Above you describe the Wadden Sea as a tidal basin, here you switch to an intertidal area. The reference in L53-55 are not about intertidal areas. I suggest to not focus here on intertidal areas**

To maintain consistency and avoid confusion, we have revised the sentence and removed the specific focus on intertidal areas. However, as the mechanisms remain relevant, we retained the description to refer more generally to sediment accumulation in the basin.

**L62: Schubel, 1974 does not seem the right reference (it is about sediments and not wind effect)**

This reference was originally included to provide historical context on how storms can impact sediment dynamics, but we agree it is not directly relevant for describing wind-induced resuspension in the Wadden Sea. We therefore removed it here to keep the introduction focused on more directly applicable studies.

**L63: Fettweis et al. (2012) is not about flocculation**

This reference was originally included to illustrate meteorological variability of suspended matter in the North Sea, but its placement in the flocculation context could have been misleading. We have therefore relocated it to the sentence focusing on weather forcing of SPM dynamics instead of flocculation.

**L65: This is a repetition of L41**

We revised the paragraph to avoid repetition and clarified the role of biochemical processes without duplicating the earlier text.

**L68: Fettweis & Van den Eynde is not about biological processes**

We have removed this reference from the sentence.

**L68-69: Flocculation is a process of aggregation and break up. It is enhanced by the occurrence of marine gels (TEP), but occurs also without biological influence, due to the cohesive properties of fine-grained minerals (especially clay minerals).**

Thank you for pointing out this nuance, we agree that it was not clearly stated. The revised text now clarifies that flocculation involves both aggregation and breakup and can occur due to both biological (e.g. TEPs) and physical (e.g. clay cohesion) mechanisms.

**L70-72: Flocs nearly always contain OM in various forms (adsorbed OM molecules, detritus and living OM).**

Thank you for this helpful detail, we agree. We have revised the sentence to clarify that natural flocs contain not only detritus but also organic matter in various forms.

**L72-74: Add a reference**

A reference has been added to support the role of floc characteristics in governing settling velocities and resuspension thresholds.

**L80: Not clear how 'excessive nutrient loads promote organic sedimentation'. Replace 'organic' by 'organic matter'. How can organic matter (generally a density close to water density) settling without mineral ballast (biomineral floc)? Add a reference.**

We have revised the text to clarify that excessive nutrient loads promote OM production, which can then form biomineral flocs and enhance sedimentation.

**L83: How important is this (that can impact seagrass) in your study?**

We agree that this reference to seagrass may imply a broader ecosystem focus than is within the scope of our study. We have revised the sentence to better reflect the relevance of fluctuating turbidity in shallow benthic environments, without overextending to specific ecological impacts.

**L85-86: It is becoming a fast evolving research topic, and many new research has been published on this subject.**

Thank you for the comment. We rephrased the sentence to reflect the growing interest in this research direction and updated the manuscript to reference relevant recent studies where appropriate.

**L96: Two monitoring station, above you only mention one.**

In this sentence, we were referring specifically to the meteorological data, which comes from a single weather station in List (Sylt, Germany). The two LTER stations mentioned earlier refer to the *Sylt Roads* monitoring sites. To avoid confusion, we have clarified the wording in the revised manuscript to distinguish between the meteorological station and the two biogeochemical monitoring stations.

## **2. Data and Methods**

**L110-112: What are the 10-20% other than tidal forcings?**

According to Fofonova et al. (2019), more than 80% of depth-averaged velocity variability in the Sylt-Rømø Bight is explained by tidal forcing, while the remaining 10–20% can be attributed to the wind stress and density gradients (baroclinic effects).

**L119: The two references are not on tides. They are probably not needed here. Here the tidal range is 1.7m while on L109 it is 2m.**

The value of 2 m in L109 refers to the average entire Sylt-Rømø Bight, while L119 refers specifically to the Königshafen embayment, which is more sheltered and exhibits slightly lower tidal amplitudes. However, to avoid confusion and since the cited references are not directly focused on tidal characteristics, we have removed the sentence and the associated references in the revised manuscript.

**L144-145: I don't think that higher harmonics and over-harmonics need references. Rephrase L144-149.**

We removed the references to avoid over-citation and rephrased the sentence to keep it concise.

**L160: You released tracers in the intertidal areas, correct? At the beginning of inundation?**

Tracers were released from all grid cells that are consistently inundated during flood phases. Still, the releases occurred at fixed three-hour intervals, allowing us to capture a full range of tidal phases and ensure statistical robustness. This was explained initially on L175–176, but we moved the justification sentence to L164 for better coherence.

**L172-174: How can the passive tracers be representative for SPM, that undergoes resuspension and deposition phases?**

We recognize that passive tracers cannot capture the full complexity of SPM behavior, particularly resuspension and deposition dynamics. However, our goal in using Lagrangian simulations was not to model sediment fate per se, but to assess hydrodynamic connectivity and typical transport timescales within the basin. These simulations, while offering an efficient and computationally inexpensive approach, help us explain patterns such as the delayed wind response at the deep station that is not so clear otherwise. (We provide a more detailed explanation of this approach in our response to point (2) in the general comments).

**L187-188: Can you mention the sampling frequency and the total amount of data. Was the sampling done during each weather conditions? Are the samples taken at the surface?**

The sampling frequency is twice a week at 1 m below the sea surface, as mentioned on L192–193 of the original manuscript. Regarding weather conditions, the measurements have not been taken in extreme storm conditions, depending on the weather/sea state restrictions of the ship operations. More details of the dataset description and evaluation are provided by Rick et al. (2017; 2023).

**L190-192: Be a little more specific with the method. Do you use HPLC for Chl?**

HPLC is not used for chlorophyll-a analysis. The chlorophyll-a concentrations were determined spectrophotometrically following the trichromatic method after 90% acetone extraction, as described in established protocols (UNESCO, 1966; Jeffrey & Humphrey, 1975). To be specific, we add this clarification in the revised manuscript.

**L195-196: The reference to PANGAEA is not useful, as there you have to search for the right files. I have downloaded the data in Rick et al. (2023), they contain data from to the period 2014-2019. The data before 2014 can be found in Rick et al. (2017) <https://doi.org/10.1594/PANGAEA.150032>**

**Can you check if these cover all the data you have used.**

Thank you for your comment and for taking the time to review the data behind the study. We referred to the survey by Rick et al, 2023, not to list all 19 links of the Pangaea. Their study does provide dataset links for data from 1973 to 2013, and separately for each year from 2014 to 2019 in their abstract. As we focused on the relatively consistent de-eutrophication period 2000-2019, the dataset provided and discussed in Rick et al, 2023, and the Pangaea links therein cover all the LTER data we have used in our study.

In response to this comment, we added all the links in the Data Availability.

**L200-203: The link can be omitted as also available in 'Data Availibilty'**

The link has been removed from the main text, as suggested.

**L205: Sea surface elevation versus SSH : use height instead of elevation?**

Although “sea surface height” and “sea surface elevation” are often used interchangeably, we agree that using “height” is more consistent with the abbreviation “SSH” and have revised the manuscript accordingly.

**L210: Do you mean; when the samples (cfr PANGAEA) were taken?**

Yes, we refer to the exact timestamps of the LTER samples (Sylt Roads dataset). As tidal measurements were not included in the original dataset, we reconstructed the SSH signal at the sampling locations using the validated model output. This allowed us to estimate tidal phase and elevation gradients at the time of sampling. The manuscript has been clarified accordingly.

**L215: Can you specify which environmental parameters were used to predict SPM concentration? How do they relate to SPM concentration?**

The predictors used in the NN model are described in detail in the manuscript (in the original version, L235–240 for the abiotic model and L244 for the whole model). However, to improve clarity, we have now added an overview table of all NN predictors in the Supplementary Materials.

**L216: Are these environmental data continuous time series? If not, what is the effect of patchiness on the outcome?**

We thank the reviewer for this observation. The environmental time series used in our analysis may naturally be patchy as they originate from field-based monitoring. Nevertheless, the 20-year duration of the dataset ensures statistically robust coverage across a wide range of wind

scenarios, light conditions and tidal phases, providing a basis for meaningful analysis. This point was also elaborated in our response to the first point in the general comments.

**L245-247: Chl-a concentration depends mainly on nutrients and grazing. How good are the two chosen proxies?**

We would like to clarify that we used temperature and sunshine duration as an input in the NN model as pragmatic proxies to approximate biological activity, since our dataset did not include more direct biological parameters (e.g. TEP, grazing rates). While these parameters do not capture the whole range of ecological interactions, their purpose in the NN framework is to help distinguish between biologically active and inactive seasons, rather than to capture specific biological mechanisms.

**L247-256: References are missing here. This looks like a description of processes: put in introduction?**

We agree that this descriptive paragraph belongs to the Introduction and have revised it accordingly.

**L252: I am not aware that detritus (is it not always organic?) contributes to flocculation actively. Detritus can be incorporated into flocs by sticky substances such as TEP.**

Following the suggestion in the previous comment, this paragraph has been moved to the Introduction. To more accurately reflect the process, we clarified that the detritus contributes by being incorporated into flocs rather than actively causing flocculation. We also removed “organic” as it was redundant.

### **3. Results**

**There is overlap between 3.1 and 3.2 (wind effect is explained in both chapters). I would advise to look only at results without interpretation of the data (keep this for the discussion).**

We appreciate the reviewer’s observation regarding potential overlap between Sections 3.1 and 3.2. In the revised manuscript, we have restructured the wind-related content to reduce repetition and clarify the distinction between seasonal patterns (Section 3.1.2) and short-term variability (Section 3.2.2). Specifically, Section 3.1.2 now focuses on the general seasonal co-variation between wind intensity and SPM concentrations, while Section 3.2.2 presents the analysis at finer temporal scales, including the influence of wind averaging (“wind memory”) and response lags. We also agree that interpretations should be presented in Discussion rather than in the Results section, and have revised accordingly.

#### **3.1 Seasonality of SPM concentration**

**L267: Adding a grid for every year would facilitate the reading of the figure**

Thank you for the feedback. In the revised version of the manuscript, to improve the overall readability, we have updated Figure 2 and displayed the time series separately for each year in a grid layout.



**L270-276: This belongs to discussion section (or intro).**

As suggested by the reviewer, we have moved this piece of text to the Introduction and further elaborated in the Discussion.

**L281-284: SPM concentration (and also Chl-a) has a log-normal distribution, taking the arithmetic mean and standard deviation is thus not correct (therefore that the standard deviation is in L284 larger than the mean). A better approach is to use the geometric mean and standard deviation.**

We acknowledge the reviewer's suggestion. While the use of geometric means and standard deviations for SPM and Chl-a concentrations might be a more suitable approach in this context, it may not be familiar to a broader audience and would require additional explanation. Since this section serves only to provide a descriptive overview of the data, we chose to present concentration ranges instead.

**L295: The colors in the figure 3 are confusing. Could you use the same color for SPM and Chl respectively.**

Thank you for the suggestion. Our colour scheme consistently uses blue for the deep station and orange for the shallow station in all figures throughout the manuscript. To maintain consistency and help readers associate each station with a single colour, we chose to differentiate variables (SPM vs. Chl-a) using marker styles and line types rather than colour.

**L316, Fig 4: The large spreading in March suggest that there is a difference between the pre-bloom values (most of them) and the post-bloom ones. Can you check it and maybe adapt the Figure. Further is it useful to keep monthly correlation when the seasons can be split up into winter, spring-bloom, summer, late-summer bloom, autumn?**

We confirm that the data in March indeed reflects a transition between pre-bloom and bloom phases, contributing to higher variability. Since the figure illustrates the data across 20 years and the timing of phytoplankton bloom varies from year to year, it is hard to perfectly delineate the pre-bloom and post-bloom phases. However, we opted to keep the monthly breakdown in Fig. 4 to preserve resolution and highlight intra-seasonal dynamics.

**L299: The difference between both station in terms of correlation is small, delete this statement.**

To avoid overstatement, the sentence has been removed in the revised manuscript.

**L300-303: When resuspension processes are the same, then also deposition ones. For phytoplankton and SPM to settle together means that the phytoplankton is contained in the floc in winter.**

The sentence has been revised to reflect that in winter, phytoplankton is likely associated with flocs, leading to co-settling behavior. We clarified that both resuspension and deposition processes contribute to the observed strong correlation, and that Chl-a may represent a relatively stable component of SPM during this season due to the phytoplankton being contained into settling aggregates.

**L306:  $R^2$  is always  $< 1$  per definition**

We agree that this statement was odd and have removed it from the manuscript.

**L306: The sentence is not fully correct. Phytoplankton is part of the SPM, both are retained on the filter. If the correlation weakens, then it means that settling of flocs and phytoplankton differs and thus not all phytoplankton is attached to flocs as in winter. It also means that there is a difference in Chl and SPM concentration over the water column. Near the surface the Chl-a concentration would be higher, because free phytoplankton will settle slower than biomineral flocs.**

Thank you for the insightful comment. We revised the sentence to clarify that phytoplankton is part of the SPM and co-retained on the filter. The observed weakening of the correlation during biologically active periods likely reflects the decoupling of active phytoplankton from flocs, resulting in different settling behaviors. While sinking rates are higher for the flocs, freely suspended phytoplankton may remain concentrated in surface layers, leading to vertical separation and reduced correlation between Chl-a and total SPM.

**L310: Which broader variables?**

To clarify this point, in the revised manuscript, we added a table to explicitly list all the input parameters included in the Neural Network, both for the winter (only abiotic) model and all seasons (abiotic + light availability, temperature).

**L324: Did you use all wind data? I would suggest to use only the wind data at the time of the samples and to compare this curve with the SPM concentration, as I suspect that the sampling has a bias towards good weather.**

Wind stress causes resuspension as an immediate response, but we also need to account for wind conditions several hours prior to sampling. Because resuspended material can remain in suspension and be redistributed by tidal currents for several hours, wind conditions preceding the sampling may also affect observed concentrations. Accordingly, for Fig.5, we did use the wind data at the time of sampling (wind dataset has an hourly resolution, and for our analysis, we take the wind data at the same hour as samples are taken). In the subsequent statistical analysis, when we consider the averaged wind speed, we average the hourly resolved data for the past n hours.

**L339-343: I see that the correlation is overall very weak, although often significant. This means that the instantaneous wind speed does not explain a large portion of the variability in SPM concentration. Figure 6 seems not necessary for me.**

We partially agree with the comment. Although the correlations are not particularly strong, considering the non-linear processes in play, they are also not negligible. The correlations are also substantial in winter as opposed to summer, which is the mechanism we intended to highlight. Moreover, within winter correlations, we see that the shallow station consistently responds to the wind when we correlate it at the time of sampling. This distinction leads us to a deeper understanding of the differences between shallow and deep stations.

**L351: 120 hours, is this prior to the sampling date?**

This is the average wind speed for 120 hours before the sampling time.

**L353-356: Still the correlation is low, meaning that wind speed can only partially explain some of the observed variability in SPM concentration.**

We recognize that “stronger” may be misleading and have revised the sentence to reflect a more accurate interpretation of the correlation strength. However, we would like to stress that the correlations and their statistical significance improve for the deep station when we apply the average of the past 120-hour wind speed. Both were compared to the wind at the time of sampling for the deep station, *and* compared to the 120-hour averaged wind speed correlated for the shallow station.

**L357: ‘crucial role’: this phrasing is exaggerated, delete ‘crucial’**

We revised the sentence to avoid overstatement.

**L359: What is the role of ‘indirect resuspension’, which I would consider as wave induced resuspensions. Do you have information on waves? I would expect that the role of waves in resuspending sediments is higher than of wind. Wind will result in changes of the advective transport of particles and waves in resuspension.**

Wind stress determines both the ‘direct’ resuspension caused by induced shear in the water column and the ‘indirect resuspension’ resulting from wave breaking. While direct wave measurements were not available for this study, their influence is implicitly represented in the wind and tide datasets used in the NN framework. Because the NN captures nonlinear interactions, both direct and indirect resuspension mechanisms are taken into account, although their individual contributions cannot be disentangled explicitly.

## **3.2 Resuspension and Time scales of Inner Basin Transport**

### **3.2.1: Is not needed**

We acknowledge that this subsection is more of supportive nature and might dilute the focus of the study. We moved it to Supplementary Materials.

**L373-381 and Figure 8: I only see marginal differences between low and high tide. I would suggest to remove the Figure and the text. You mention sampling depth, see my comment for L187-188.**

In such a tidal basin with shallow bathymetry, the depth of the water column, which is reflected by the sea surface height (SSH) influences the concentrations of a sampled material. However, as it is not the main focus of the study, we decided to move this part to the Supplementary Material.

**L383: The difference in current velocities between ebb and flood are a better indicator for SPM concentration during sampling than its (non) relation with SSH.**

The phase of the tidal cycle determines the velocity field. Due to the strong role of non-linear processes in the domain, ebb and flood are not equally strong in terms of maximum and mean velocities. This asymmetry is evident in the figure below, where SPM concentrations are shown

together with the SSH gradient (derivative is calculated using forward scheme, time step is ~5 min) and velocity asymmetry:

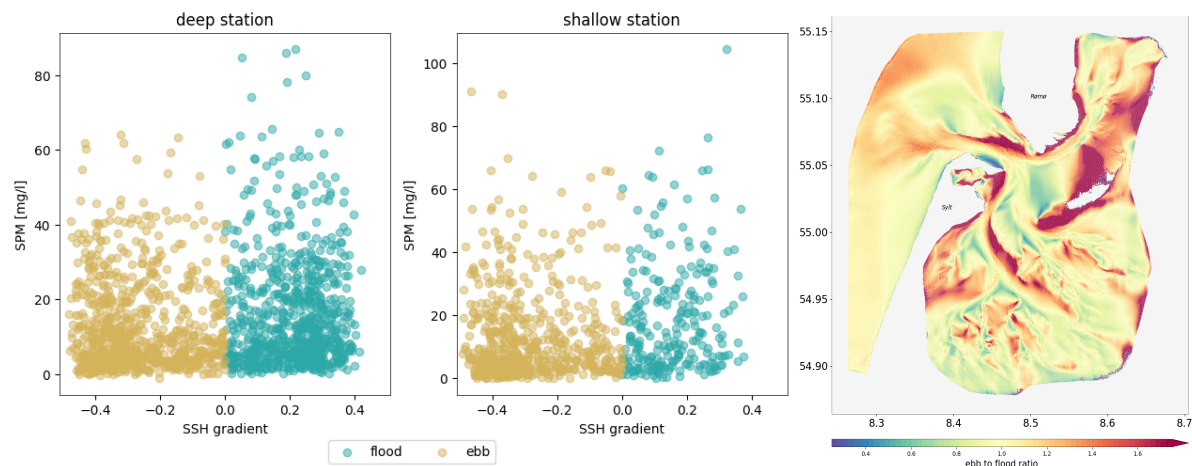

Figure: Relationship between suspended particulate matter (SPM) concentrations and tidal phase, represented by the gradient of reconstructed sea surface height (SSH), at the deep and shallow stations (left, middle). Ebb and flood phases show asymmetric distributions, with highest SPM concentrations occurring during flood. The spatial pattern of mean transport velocity asymmetry (ebb-to-flood ratio) in the Sylt-Rømø Bight (right) further illustrates that ebb and flood currents are not equally strong, reflecting non-linear tidal dynamics in the basin.

We also refer to our earlier work (Fofonova et al., 2019; Konyssova et al., 2025) for a more detailed analysis of tidal asymmetry in this system, and we have expanded the Discussion section to reflect on this aspect.

**L400-405: In Figure 7 you used a 120h period for both stations, although 12h would have been better for the shallow station? Again, the  $R^2$  is low, so that the explanatory variability of wind on SPM concentration is small. Figure 10 is not necessary.**

Figure 10 has been placed in the Supplementary Materials, as we agree that the value added is very limited.

However, the reason we chose to show 120 hours originates from the results we observe in Figure 9, where the peak correlation of wind speed and SPM concentrations at the deep station is observed in around 120 hours.

**L419-420: Seems logic to me that a storm in summer has a similar effect (increases resuspension) as a storm in winter. Delete 'even' in L419**

Revised accordingly.

**L426: Although there is a link between SPM and a passive tracer, it is not the same. How representative are the results shown in Figure 11. Why not add SPM characteristics to the passive tracers (critical shear stress for erosion and settling velocity)?**

Thank you for raising this point. We agree that passive tracers do not fully reproduce the behavior of suspended particulate matter, especially when it comes to settling, flocculation, or resuspension thresholds. Unfortunately, we lack the sediment-specific parameters needed to support such sediment simulations. As outlined in our response to point 2 in the general

comments, the purpose of this simplified setup was not to accurately model SPM fate, but to illustrate hydrodynamic connectivity under tidal forcing and to identify dominant source areas and transport pathways to the stations. We have clarified this more explicitly in the revised manuscript.

**L430: Can you explain what you mean by ‘stochastic fluctuations’?**

By “stochastic fluctuations”, we refer to the irregular, short-term variability in wind-driven transport dynamics that can enhance dispersion but do not significantly contribute to basin-wide transport, which is predominantly driven by tides.

**L431: 80% of the velocity variability is due to tide, do you mean by ‘relatively minor (wind forcing)’ the remaining 20%? You should be more specific.**

We appreciate the opportunity to clarify this point. The statement regarding “relatively minor” refers not to the 20% in velocity variability presented in Fofonova et al. (2019), but to results from our previous Lagrangian transport analysis (Konysova et al., 2025). That study showed that adding summer wind forcing increased particle dispersion but did not alter the dominant transport pathways, which remained primarily driven by non-linear tidal dynamics. Meanwhile, the ~20% residual in velocity variability reported by Fofonova et al. (2019) includes not only wind-driven effects but also baroclinic circulation.

**L435-439: Has been mentioned in the Method section**

As suggested, we removed this piece from the Results to avoid redundancy.

**L439-443: There are differences, but both are also very similar.**

We agree that both stations share common transport routes, which is expected given their proximity and location relative to the tidal inlet and the main tidal channel (Lister Ley). However, the probability distribution reveals distinct differences in dominant source regions. While the shallow station shows a clear concentration of tracer origins in the Königshafen embayment, the deep station is fed by a broader and more dispersed area, with relatively low contributions from Königshafen. This spatial variation is meaningful and reflects differences in connectivity patterns that are important to highlight.

**L457: See my previous comment, I am not convinced that passive tracer give the same result as ‘active’ tracers (such as SPM).**

We agree that passive tracer simulations cannot fully represent the transport behavior of active particulate matter such as SPM. The figures are intended to illustrate the hydrodynamic connectivity between the stations and the surrounding basin under tidal forcing, helping to identify likely source regions and transport pathways. We acknowledge that the phrase “comprehensive picture of SPM transport” may have overstated the scope of this experiment, and we have revised the wording accordingly to clarify the intent and avoid overstatement.

### **3.3 Neural Network**

**L492: Salinity as a proxy for baroclinic conditions has not been explained. How do baroclinic conditions affect SPM concentrations?**

Salinity was included as a proxy for baroclinic effects, particularly the density gradients that locally drive the circulation in the area (Burchard et al., 2008).

**L497-501: The effect of temperature on flocculation in marine areas is small, and the effect of salinity on flocculation is important at the limit of the sea water intrusion in estuaries (so at low salinities).**

We acknowledge the reviewer's comment. We consider that the influence of temperature and salinity on flocculation varies depending on site-specific dynamics. In our study region, salinity variability is limited due to minimal freshwater input, so its effect on flocculation is expected to be minor. Temperature, on the other hand, while not a strong flocculation driver on its own, was considered due to its indirect influence on biological processes (e.g., phytoplankton growth, bacterial metabolism, EPS production). We have revised the text to reflect these distinctions more accurately and avoid overstating the direct role of these parameters.

**L514: How did you obtain that wind explains 40% of the decrease?**

The ~40% refers to the difference in median SPM concentrations between winter and summer *predicted* by the NN trained only on physical drivers. Specifically, the NN-predicted values in summer remain ~40% higher than the observed SPM concentrations, indicating that wind conditions alone cannot fully explain the seasonal drop.

**L518-520: How did you define the seasons? As mentioned before, spring (March) may contain some typical winter conditions (pre-bloom) and autumn maybe some typical late summer conditions (summer bloom). Both may blur your results. To explain it by wind conditions is therefore not convincing.**

We acknowledge the reviewer's point and agree that biological and physical transitions do not necessarily align with calendar months. We used seasonal boundaries based on observed seasonal cycles in Chl-a concentrations at the study site rather than using calendar-based or astronomical definitions. Specifically, we used the following delineations:

- Winter: November 20 – February 19 (low biological activity, low Chl-a)
- Spring: February 20 – May 31 (phytoplankton bloom initiation and peak)
- Summer: June 1 – September 19 (post-bloom conditions, high light, reduced Chl-a)
- Autumn: September 20 – November 20 (transitional period).

The overestimations discussed in the NN regression plots are therefore interpreted in the context of these adjusted seasonal windows. This has been missed in the original version, and has been explicitly clarified in the revised text.

**L538-542: Is also included in tch 3.3.1**

We revised the text and removed the repeated information.

#### **4. Discussion**

**L549-550: Biological processes are only introduced indirectly. There is no evidence of phytoplankton biomass or grazing in your data set.**

We acknowledge that our dataset does not include direct measurements of phytoplankton biomass, grazing, or exopolymers. As mentioned earlier, chlorophyll-a is used here as a general proxy for phytoplankton presence and associated biological processes. Since this is a proxy rather than direct evidence, we cannot resolve individual mechanisms such as flocculation or grazing due to the absence of more detailed biological data. Nevertheless, it provides a basis for exploring the relative contribution of biologically mediated processes to SPM concentration variability. We have elaborated on this in our response to point 4 in the general comments.

#### **4.1 Biological interactions**

**L562-564: Chl is not a good proxy for biological mediated flocculation. The latter is driven by the occurrence of exopolymers that have been excreted by the phytoplankton.**

We agree that biologically mediated flocculation is driven by exopolymers such as TEP and EPS rather than directly by phytoplankton biomass. However, given the absence of direct measurements of these substances or phytoplankton species composition, we used Chl-a as a general proxy for biological activity, including but not limited to flocculation.

**L572-575: The decoupling between SPM and Chl-a from spring onward, does not explain the formation of larger flocs with higher settling velocity. Further, the formation of larger flocs occurs already at the start of the phytoplankton bloom and not only at the end.**

Thank you for highlighting this point. The cited studies show that flocculation intensifies both at the onset of the bloom and during its decline. Our revised sentence reflects this timing, making clear that larger and more rapidly settling flocs form early in the bloom and continue afterwards, helping explain the observed decoupling between Chl-a and SPM concentrations.

**L575-577: Can you give a number that shows how big the influence of temperature is.**

Temperature affects SPM both directly through physical processes and indirectly by modulating biological activity. To evaluate its role, we tested the full-year model with abiotic parameters only excluding temperature and compared it against a model where temperature was included. The improvement in correlation was modest in winter ( $R = 0.66$  to  $0.7$ ) but substantial in other seasons: from  $0.61$  to  $0.78$  in spring, from  $0.38$  to  $0.73$  in summer, and  $0.56$  to  $0.76$  in autumn (table below; also included in the Supplementary Materials). Additionally, a model with two biological proxies (temperature and sunshine hours) was added in the last column, which shows a further improved correlation. The results indicate that the combined effect of temperature and light is minor in winter but critical for capturing SPM variability during biologically active seasons.

**Table: Mean, median values and correlation (R) of SPM concentrations, [mg/L], from observations versus predictions by NN trained on all abiotic dataset (no temperature), all abiotic dataset + temperature, and all abiotic dataset + temperature & light for the Deep Station.**

| seasons |                           | observed     | NN: all seasons abiotic<br>(no temperature) | NN: all seasons<br>abiotic + temperature | NN: all seasons abiotic<br>+ temperature, light |
|---------|---------------------------|--------------|---------------------------------------------|------------------------------------------|-------------------------------------------------|
| winter  | mean<br>median,<br>[mg/L] | 27.6<br>25.9 | 19.2                                        | 26.3                                     | 25.6                                            |
|         |                           |              | 17.2                                        | 23.7                                     | 23.6                                            |
|         |                           |              | $R = 0.66$                                  | $R = 0.7$                                | $R = 0.73$                                      |
|         |                           |              |                                             |                                          |                                                 |
| spring  | mean<br>median,<br>[mg/L] | 16.5<br>13.3 | 14.8                                        | 17                                       | 16.6                                            |
|         |                           |              | 13.17                                       | 14.2                                     | 14.3                                            |
|         |                           |              | $R = 0.61$                                  | $R = 0.78$                               | $R = 0.82$                                      |
|         |                           |              |                                             |                                          |                                                 |
| summer  | mean<br>median,<br>[mg/L] | 6.2<br>4.2   | 7.9                                         | 7.1                                      | 7.1                                             |
|         |                           |              | 7.1                                         | 5.8                                      | 5.8                                             |
|         |                           |              | $R = 0.38$                                  | $R = 0.65$                               | $R = 0.73$                                      |
|         |                           |              |                                             |                                          |                                                 |
| autumn  | mean<br>median,<br>[mg/L] | 11.6<br>8.5  | 12.6                                        | 13.3                                     | 11.9                                            |
|         |                           |              | 10.8                                        | 11.2                                     | 9.3                                             |
|         |                           |              | $R = 0.56$                                  | $R = 0.76$                               | $R = 0.78$                                      |
|         |                           |              |                                             |                                          |                                                 |

**L585-588: Filter feeders will remove SPM from the system by producing fecal pellets. The POC fraction in the SPM depends on the SPM concentration (see Schartau et al., 2019).**

The revised paragraph specifies, with reference to Schartau et al. (2019), that the POC fraction in SPM varies with total SPM concentration, which influences the efficiency and variability of organic matter removal.

**L588-595: What is the relevance for your study? They remain speculative when you do not have data about it.**

The relevance of this paragraph lies in situating our findings within the broader ecological context of the Sylt-Rømø Bight. Therefore, we are briefly discussing the potential contribution of benthic-pelagic coupling, including from introduced species, on the variability of SPM concentrations. We have revised the paragraph to clarify that this point is raised as a potential direction for future work rather than a confirmed mechanism found in this study.

## 4.2 Wind & Tidal Control

**This chapter is a summary of the results and not a discussion.**

We revised Section 4.2 to shift the focus from summarizing results toward a more interpretative discussion. Descriptive elements have been reduced or condensed, and we now highlight how the observed timescales and station-specific responses relate to sediment characteristics, transport pathways, and broader findings from the literature (e.g., de Jonge and van Beusekom,



1995; Friedrichs and Perry, 2001; Winterwerp, 2001). These changes aim to clarify the implications of the wind and tidal forcing results and situate our findings within the broader context of SPM dynamics in shallow tidal systems.

### 4.3 Neural Network

**This chapter is a summary of the results and not a discussion.**

Following the reviewer's suggestion, we revised the section to reduce repetition of results and focus more clearly on the implications of the observed patterns. The revised text emphasizes how the neural network results support and extend the process-based interpretation of seasonal shifts in dominant SPM drivers. We also highlight the added value of the NN approach in capturing non-linear interactions and complementing statistical methods, especially in complex, biologically influenced periods where data limitations exist.

### 5. Conclusion

**L712-713: The correlation between wind speed and SPM concentration was never strong.**

Thank you for pointing this out. We acknowledge that the phrase could be misleading given the complex and non-linear nature of the mechanisms influencing SPM concentration variability. To avoid overstating the correlations and to reduce redundancy with the preceding sentence, we have revised the sentence to emphasize the role of wind stress in shaping short-term variability.

---

### References:

- Burchard, H., Bolding, K., Rippeth, T. P., Stips, A., Simpson, J. H., and Sündermann, J.: Microstructure of turbulence in the northern North Sea: a comparative study of observations and model simulations, *Journal of Sea Research*, 47, 223–238, [https://doi.org/10.1016/S1385-1101\(02\)00126-0](https://doi.org/10.1016/S1385-1101(02)00126-0), 2002.
- Burchard, H., Flüser, G., Staneva, J. V., Badewien, T. H., and Riethmüller, R.: Impact of Density Gradients on Net Sediment Transport into the Wadden Sea, *Journal of Physical Oceanography*, 38, 566–587, <https://doi.org/10.1175/2007JPO3796.1>, 2008.
- Cloern, J. E.: The relative importance of light and nutrient limitation of phytoplankton growth: a simple index of coastal ecosystem sensitivity to nutrient enrichment, *Aquatic Ecology*, 33, 3–15, <https://doi.org/10.1023/A:1009952125558>, 1999.
- Fettweis, M., Monbaliu, J., Baeye, M., Nechad, B., and Van Den Eynde, D.: Weather and climate induced spatial variability of surface suspended particulate matter concentration in the North Sea and the English Channel, *Methods in Oceanography*, 3–4, 25–39, <https://doi.org/10.1016/j.mio.2012.11.001>, 2012.

Fofonova, V., Androsov, A., Sander, L., Kuznetsov, I., Amorim, F., Hass, H. C., and Wiltshire, K. H.: Non-linear aspects of the tidal dynamics in the Sylt-Rømø Bight, south-eastern North Sea, *Ocean Sci.*, 15, 1761–1782, <https://doi.org/10.5194/os-15-1761-2019>, 2019.

Friedrichs, C. and Perry, J.: Tidal salt marsh morphodynamics: a synthesis, *Journal of Coastal Research*, 27, 7–37, 2001.

de Jonge, V. N. and van Beusekom, J. E. E.: Wind- and tide-induced resuspension of sediment and microphytobenthos from tidal flats in the Ems estuary, *Limnol. Oceanogr.*, 40, 776–778, <https://doi.org/10.4319/lo.1995.40.4.0776>, 1995.

Konyssova, G., Sidorenko, V., Androsov, A., Sander, L., Danilov, S., Rubinetti, S., Burchard, H., Winter, C., and Wiltshire, K. H.: Changes in tidal dynamics in response to sea level rise in the Sylt-Rømø Bight (Wadden Sea), *Ocean Dynamics*, 75, 43, <https://doi.org/10.1007/s10236-025-01688-1>, 2025.

Rick, J. J., van Beusekom, J., Romanova, T., and Wiltshire, K. H.: Long-term physical and hydrochemical measurements at Sylt Roads LTER (1973–2013), Wadden Sea, North Sea, links to data sets, <https://doi.org/10.1594/PANGAEA.150032>, 2017.

Rick, J. J., Scharfe, M., Romanova, T., Van Beusekom, J. E. E., Asmus, R., Asmus, H., Mielck, F., Kamp, A., Sieger, R., and Wiltshire, K. H.: An evaluation of long-term physical and hydrochemical measurements at the Sylt Roads Marine Observatory (1973–2019), Wadden Sea, North Sea, *Earth Syst. Sci. Data*, 15, 1037–1057, <https://doi.org/10.5194/essd-15-1037-2023>, 2023.

Schartau, M., Riethmüller, R., Flöser, G., Van Beusekom, J. E. E., Krasemann, H., Hofmeister, R., and Wirtz, K.: On the separation between inorganic and organic fractions of suspended matter in a marine coastal environment, *Progress in Oceanography*, 171, 231–250, <https://doi.org/10.1016/j.pocean.2018.12.011>, 2019.

Stanev, E. V., Dobrynin, M., Pleskachevsky, A., Grayek, S., and Günther, H.: Bed shear stress in the southern North Sea as an important driver for suspended sediment dynamics, *Ocean Dynamics*, 59, 183–194, <https://doi.org/10.1007/s10236-008-0171-4>, 2009.

UNESCO (1966) Determination of Photosynthetic Pigments in Sea Waters. Monographs on oceanographic methodology, Paris, 66 p.
